# Supplementary material
Source: PubMed Central journal article supplement (PMC4561735)
Supplement: MCB.00381-15_zmb019150957so1.pdf [file MCB.00381-15_zmb019150957so1.pdf]

## Supplemental Data

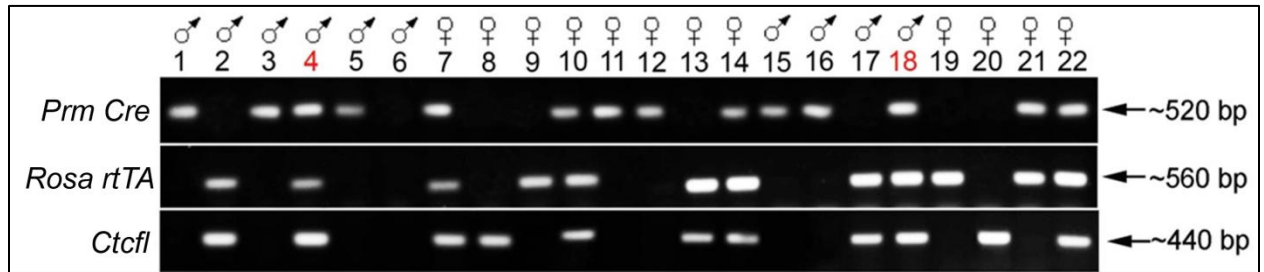

**Figure S1:** PCR products for 22 potential triple transgenic progeny. Animals #4, 7, 10, 14, 18 and 22 contain all three transgenes. Animals # 4 and 18 (in red) are male and were used to sire ubiquitous *Ctcfl* expressing embryos/fetuses when the females they mated to were given doxycycline throughout their pregnancies.

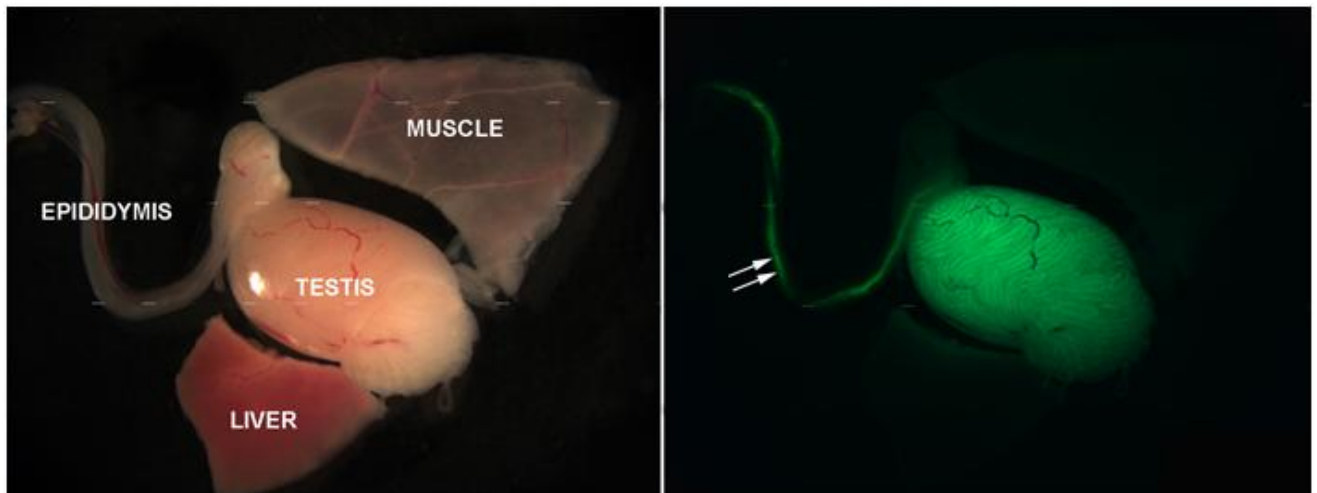

**Figure S2:** Macroscopic view of liver, testis and muscle tissue from transgenic males under brightfield (left) and fluorescence (right) microscopy. Note that fluorescence is seen only in the testis, epididymis and vasa deferentia (arrows).

**Table S1.** PCR primers used for genotyping.

|                                     | Primers                                                                                   |
|-------------------------------------|-------------------------------------------------------------------------------------------|
| Internal Positive Control (~324 bp) | F 5'-CTA GGC CAC AGA ATT GAA AGA TCT -3'<br>R 5'- GTA GGT GGA AAT TCT AGC ATC ATC C -3'   |
| <i>Rosa rtTA</i> (~560 bp)          | F-5'- GAA TCG AAG GTT TAA CAA CCC GTA A-3'<br>R-5'- GGA CCC ACT TTC ACA TTT AAG TTG T -3' |
| <i>Cre</i> (~520 bp)                | F-5'-AAG TTC ATC TGC ACC ACC G -3'<br>R-5'- TCC TTG AAG AAG ATG GTG CG -3'                |
| <i>Ctcf1</i> (~440 bp)              | F 5'-GGA ACT GAC AGC CAA CCC AGT CC-3'<br>R 5'-CGG TGG GAG GCC TAT ATA AGC AG-3'          |

**Table S2.** qRT-PCR primers.

|                                        | Primers                                                                       |
|----------------------------------------|-------------------------------------------------------------------------------|
| <i>Ctcf1</i> transgene (~163 bp)       | F 5'- ACC AGT GTT CCA GGG GCA AA -3'<br>R 5'- GAC ACA GAT GTG GCC GTT CG -3'  |
| <i>Ctcf1</i> endogenous gene (~161 bp) | F-5'- CAC CTG TGC CTC AAG TGT GA -3'<br>R-5'- CCT TCC TTG TGT CCT GCT TC-3'   |
| <i>Ctcf</i> (~171 bp)                  | F-5'- CGC GAA GAA TGA CCA CAA AT -3'<br>R-5'- GAC TCC TCC ACA ATG GCT TC -3'  |
| <i>Gapdh</i> (~150 bp)                 | F-'5-CAA TGC ATC CTG CAC CAC CAA CT-3'<br>R-'5-TCA CGC CAC AGC TTT CCA GAG-3' |
